# Supplementary material for: Detection of Porcine Circovirus Type 2a and Pasteurella multocida Capsular Serotype D in Growing Pigs Suffering from Respiratory Disease
Source: MDPI journal article supplement (doi:10.3390/vetsci9100528), 2022-09-27
Supplement: s1 [file s1]

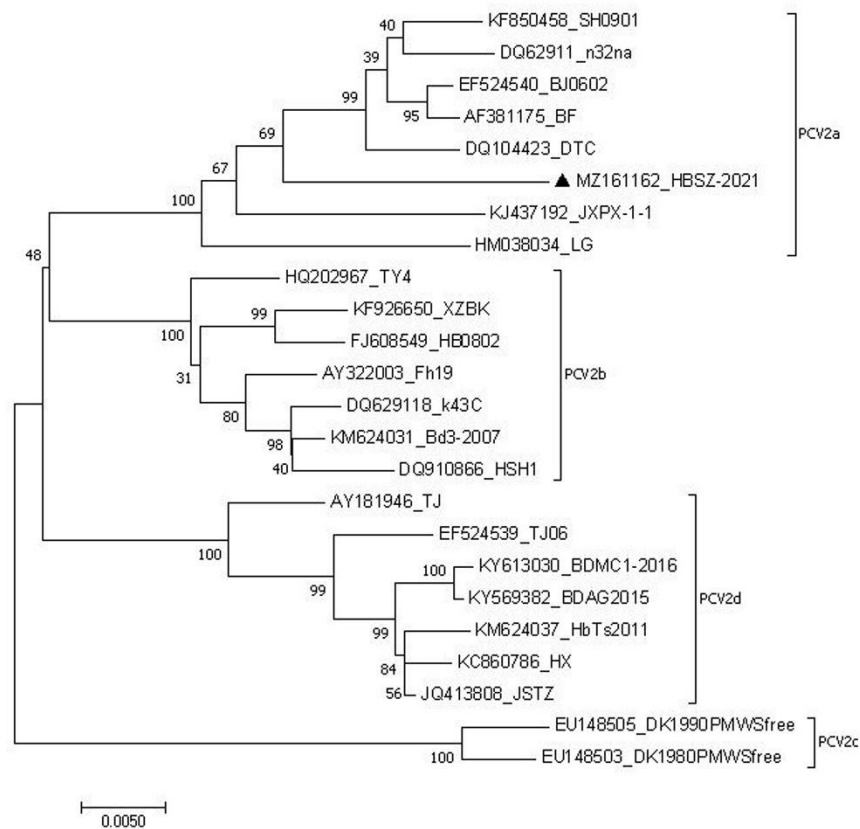

**Figure S4.** Phylogenetic trees of PCV2 HBSZ-2021 strain and the reference strains based on the genome sequences. The information of PCV2 reference strains is shown in Table 2. ▲The detected strain HBSZ-2021.

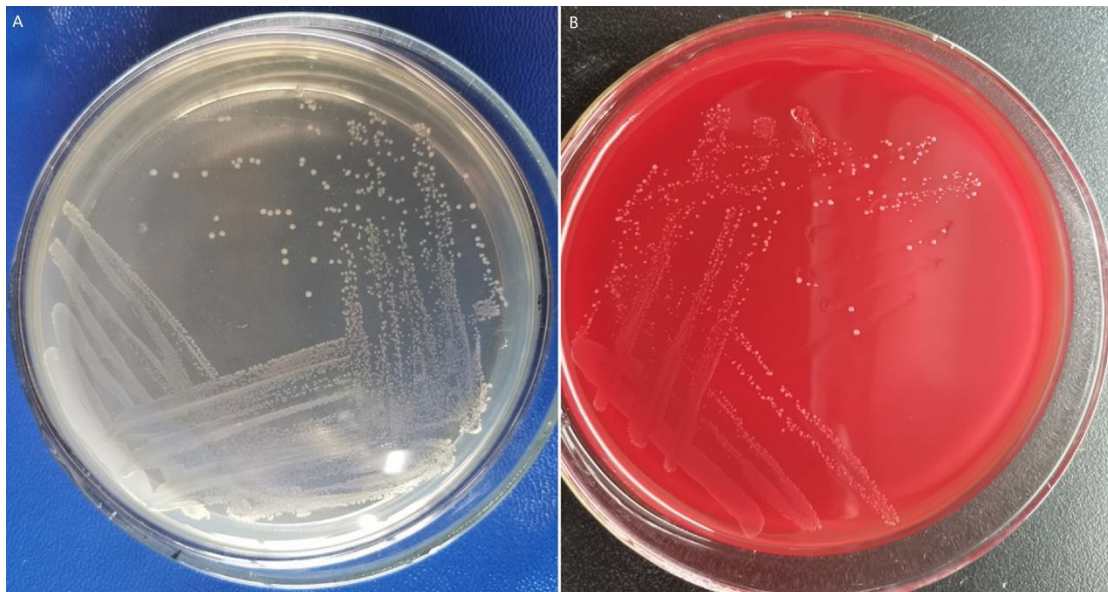

**Figure S5.** Culture characteristics of the bacterial isolate. A. 5% FBS nutrient agar; B. 5% rabbit blood nutrient agar.

|            |    | Percent Identity |      |      |       |      |      |      |      |      |      |      |      |      |      |      |    |                                       |
|------------|----|------------------|------|------|-------|------|------|------|------|------|------|------|------|------|------|------|----|---------------------------------------|
| Divergence |    | 1                | 2    | 3    | 4     | 5    | 6    | 7    | 8    | 9    | 10   | 11   | 12   | 13   | 14   | 15   |    |                                       |
|            | 1  |                  | 99.9 | 99.7 | 99.7  | 99.7 | 99.7 | 99.4 | 95.3 | 99.4 | 97.6 | 97.5 | 93.5 | 92.5 | 94.3 | 94.5 | 1  | OK236057-Pm-Swine-China               |
|            | 2  | 0.1              |      | 99.8 | 99.8  | 99.8 | 99.8 | 99.5 | 95.4 | 99.5 | 97.7 | 97.6 | 93.6 | 92.6 | 94.4 | 94.6 | 2  | CP013291-Pm-Bovine-China              |
|            | 3  | 0.3              | 0.2  |      | 100.0 | 99.7 | 99.7 | 99.3 | 95.4 | 99.5 | 97.6 | 97.4 | 93.6 | 92.7 | 94.3 | 94.7 | 3  | CP072655-Pm-Yak-China                 |
|            | 4  | 0.3              | 0.2  | 0.0  |       | 99.7 | 99.7 | 99.3 | 95.4 | 99.5 | 97.6 | 97.4 | 93.6 | 92.7 | 94.3 | 94.7 | 4  | CP066223-Pm-Yak-China                 |
|            | 5  | 0.3              | 0.2  | 0.3  | 0.3   |      | 99.7 | 99.3 | 95.2 | 99.3 | 97.6 | 97.4 | 93.5 | 92.5 | 94.3 | 94.6 | 5  | FJ405342-Pm-Native                    |
|            | 6  | 0.3              | 0.2  | 0.3  | 0.3   | 0.3  |      | 99.6 | 95.2 | 99.3 | 97.6 | 97.4 | 93.4 | 92.5 | 94.3 | 94.5 | 6  | FJ405341-Pm-Swine-SouthKorea          |
|            | 7  | 0.6              | 0.5  | 0.7  | 0.7   | 0.7  | 0.4  |      | 94.9 | 99.1 | 97.5 | 97.2 | 93.2 | 92.2 | 93.9 | 94.1 | 7  | FJ463827-Pm-Chicken-SouthKorea        |
|            | 8  | 2.8              | 2.8  | 2.8  | 2.8   | 3.0  | 3.0  | 3.3  |      | 96.3 | 94.5 | 94.9 | 93.3 | 92.1 | 93.4 | 94.3 | 8  | NR_118749-Pm-USA                      |
|            | 9  | 0.6              | 0.5  | 0.5  | 0.5   | 0.7  | 0.7  | 1.0  | 3.1  |      | 97.1 | 98.1 | 93.0 | 92.4 | 93.9 | 94.0 | 9  | MN080875-Pm-Moschusberezovskii-China  |
|            | 10 | 2.5              | 2.3  | 2.5  | 2.5   | 2.4  | 2.4  | 2.6  | 5.0  | 3.0  |      | 96.2 | 91.4 | 90.8 | 92.3 | 92.3 | 10 | E05329-Pm-Japan                       |
|            | 11 | 2.5              | 2.5  | 2.6  | 2.6   | 2.7  | 2.6  | 2.9  | 3.2  | 1.9  | 3.9  |      | 94.3 | 93.4 | 94.7 | 95.2 | 11 | LC619668-Pm-Oryctolagusuniculus-Japan |
|            | 12 | 6.8              | 6.7  | 6.7  | 6.7   | 6.8  | 6.9  | 7.2  | 6.3  | 7.3  | 9.2  | 5.9  |      | 96.4 | 96.6 | 97.4 | 12 | U57072-Ph-Bovine-USA                  |
|            | 13 | 7.9              | 7.8  | 7.6  | 7.6   | 7.9  | 7.9  | 8.3  | 6.9  | 8.0  | 9.8  | 6.9  | 3.7  |      | 95.4 | 95.9 | 13 | U57066-Ph-Sheep-USA                   |
|            | 14 | 5.7              | 5.6  | 5.7  | 5.7   | 5.7  | 5.7  | 6.0  | 5.3  | 6.1  | 7.8  | 5.2  | 3.2  | 4.5  |      | 98.1 | 14 | U57070-Ph-Bovine-USA                  |
|            | 15 | 5.7              | 5.6  | 5.5  | 5.5   | 5.7  | 5.7  | 6.1  | 5.3  | 6.3  | 8.1  | 4.9  | 2.7  | 4.3  | 1.6  |      | 15 | AF224287-Ph-USA                       |
|            |    | 1                | 2    | 3    | 4     | 5    | 6    | 7    | 8    | 9    | 10   | 11   | 12   | 13   | 14   | 15   |    |                                       |

**Figure S6.** Homology analysis of the bacterial isolate and the reference strains based on 16S rDNA sequence. The data above and below the line of black cells refer to the percent identity and difference between the corresponding two sequences, respectively. The information of the reference strains is shown in Table 3.
